# Supplementary material for: Adducts of triangular silver(i) 3,5-bis(trifluoromethyl)pyrazolate with thiophene derivatives: a weak interaction model of desulfurization
Source: Royal Society of Chemistry journal article supplement (doi:10.1039/c9dt03344k), 2019-01-01
Supplement: c9dt03344k1.pdf [file c9dt03344k1.pdf]

Electronic Supplementary Information (ESI) for:

**Adducts of Triangular Silver(I) 3,5-Bis(trifluoromethyl)pyrazolate  
with Thiophene-Derivatives: A Weak Interaction Model of  
Desulfurization**

Rongrong Liu,<sup>a</sup> Wenhua Zhang,<sup>a</sup> Donghui Wei,<sup>a</sup> Jing-Huo Chen\*,<sup>a</sup> Seik Weng Ng,<sup>b</sup> Guang Yang\*,<sup>a</sup>

\* yang@zzu.edu.cn; jhchen@zzu.edu.cn

<sup>a</sup> College of Chemistry, Zhengzhou University, Henan, Zhengzhou, 450001, P. R. China.

<sup>b</sup> Department of Chemistry University of Malaya, Kuala Lumpur, Malaysia.

## Measurements and instruments

All commercial materials were used as received without further purification. NMR spectra were recorded on a Bruker DPX-600 spectrometer. Powder X-ray diffraction (PXRD) data were collected using a PANalytical X-Pert Pro powder diffractometer with Cu K $\alpha$  radiation. The Fourier transform infrared (FT-IR) spectra were obtained in the range 400-4000 cm<sup>-1</sup> on a Nicolet NEXUS 470-FTIR spectrophotometer using KBr pellets. Thermogravimetric analyses (TGA) were conducted on a Netzsch STA 449 F5 by heating the sample from 40 to 800 °C under nitrogen at a rate of 20 °C•min<sup>-1</sup>. The Ag content was analyzed by means of an Agilent inductively coupled plasma (ICP) OES730 spectrometer. DBT and DMDBT contents were determined by Agilent 1100 HPLC system.

## Experimental Procedures

### Synthesis of Ag<sub>3</sub>pz<sub>3</sub>·DBT

Ag<sub>3</sub>pz<sub>3</sub> (0.012 mmol, 11.2 mg) and DBT (0.024 mmol, 4.4 mg) were dissolved in 2 mL of dichloromethane. The solution was allowed to slow evaporation at 5 °C for 2 days to afford the colorless needle crystals of Ag<sub>3</sub>pz<sub>3</sub>·DBT along with some unreacted DBT crystals. The pure sample of Ag<sub>3</sub>pz<sub>3</sub>·DBT can be obtained by washing the mixture with petroleum ether. Yield: 11.7 mg, 0.0104 mmol, 87%. Mp: 201-203 °C (melts with dec.) <sup>1</sup>H NMR (600 MHz, CD<sub>2</sub>Cl<sub>2</sub>):  $\delta$  8.06 (d,  $J$  = 7.7 Hz, 2H, Ph), 7.69 (d,  $J$  = 7.7 Hz, 2H, Ph), 7.42 (t,  $J$  = 7.2 Hz, 2H, Ph), 7.38 (t,  $J$  = 7.5 Hz, 2H, Ph), 7.07 (s, 3H, Pz-H) ppm. <sup>13</sup>C NMR (151 MHz, CD<sub>2</sub>Cl<sub>2</sub>):  $\delta$  139.44 (s, Thienyl), 135.78 (s, Thienyl), 127.37 (s, Ph), 125.04 (s, Ph), 123.22 (s, Ph), 121.98 (s, Ph), 120.86 (q, <sup>1</sup> $J_{CF}$  = 270.29 Hz, CF<sub>3</sub>), 103.57 (s, Pz-C<sub>4</sub>) ppm.

### Synthesis of Ag<sub>3</sub>pz<sub>3</sub>·DMDBT

This adduct was prepared in a similar way as for Ag<sub>3</sub>pz<sub>3</sub>·DBT, using DMDBT (0.024 mmol, 5.1 mg) instead of DBT. Yield: 12.4 mg, 0.0108 mmol, 90%. Mp: 207-210 °C (melts with dec.) <sup>1</sup>H NMR (600 MHz, CD<sub>2</sub>Cl<sub>2</sub>):  $\delta$  7.84 (d,  $J$  = 7.8 Hz, 2H, Ph), 7.34 (t,  $J$  = 7.5 Hz, 2H, Ph), 7.19 (d,  $J$  = 7.1 Hz, 2H, Ph), 7.07 (s, 3H, Pz-H), 2.41 (s, 6H, CH<sub>3</sub>) ppm. <sup>13</sup>C NMR (151 MHz, CD<sub>2</sub>Cl<sub>2</sub>):  $\delta$  139.39 (s, Thienyl), 136.20 (s, Thienyl), 133.15 (s, Ph), 127.64 (s, Ph), 125.54 (s, Ph), 119.56 (s, Ph), 120.86 (q, <sup>1</sup> $J_{CF}$  = 269.79 Hz, CF<sub>3</sub>), 103.60 (s, Pz-C<sub>4</sub>), 20.41 (s, CH<sub>3</sub>) ppm.

### Synthesis of Ag<sub>3</sub>pz<sub>3</sub>·BT

This adduct was obtained as pure phase in a similar way as for Ag<sub>3</sub>pz<sub>3</sub>·DBT, using BT (0.06 mmol, 8.1 mg) instead of DBT within a week. Yield: 10.5 mg, 0.0098 mmol, 82%. Mp: 167-169 °C (melts with dec.) <sup>1</sup>H NMR (600 MHz, CD<sub>2</sub>Cl<sub>2</sub>):  $\delta$  7.86 (d,  $J$  = 7.5 Hz, 1H, Ph), 7.80 (d,  $J$  = 7.4 Hz, 1H, Ph), 7.43 (d,  $J$  = 5.3 Hz, 1H, Thienyl), 7.34 (m, 3H,  $J$  = 6.9 Hz, Ph and Thienyl), 7.09 (s, 3H, Pz-H) ppm. <sup>13</sup>C NMR (151 MHz, CD<sub>2</sub>Cl<sub>2</sub>):  $\delta$  144.90 (q, <sup>2</sup> $J_{CF}$  = 35.74 Hz, CCF<sub>3</sub>), 140.05 (s, Thienyl), 140.01 (s, Thienyl), 126.82 (s, Thienyl), 124.72 (s, Ph), 124.69 (s, Ph), 124.34 (s, Thienyl), 124.04 (s, Ph), 122.85 (s, Ph), 120.87 (q, <sup>1</sup> $J_{CF}$  = 267.77 Hz, CF<sub>3</sub>), 103.65 (s, Pz-C<sub>4</sub>) ppm.

### Synthesis of Ag<sub>3</sub>pz<sub>3</sub>·DMT

This adduct was obtained as pure phase in a similar way as for the Ag<sub>3</sub>pz<sub>3</sub>·DBT, using DMT (0.36 mmol, 42  $\mu$ L) instead of DBT within a week. Yield: 10.7 mg, 0.0102 mmol, 85%. Mp: 178-180 °C (melts with dec.) <sup>1</sup>H NMR (600 MHz, CD<sub>2</sub>Cl<sub>2</sub>):  $\delta$  7.09 (s, 3H, Pz-H), 6.51 (s, 2H, Thienyl), 2.39 (s, 6H, CH<sub>3</sub>) ppm. <sup>13</sup>C NMR (151 MHz, CD<sub>2</sub>Cl<sub>2</sub>):  $\delta$  144.99 (q, <sup>2</sup> $J_{CF}$  = 36.8 Hz, CCF<sub>3</sub>), 137.96 (s, DMT-C), 125.24 (s, DMT-CH), 120.90 (q, <sup>1</sup> $J_{CF}$  = 269.28 Hz, CF<sub>3</sub>), 103.67 (s, Pz-C<sub>4</sub>), 15.29 (s, DMT-CH<sub>3</sub>) ppm.

### Desulfurization Performance

1.3 Equivalent amount of  $\text{Ag}_3\text{pz}_3$  was added to 10 mL of model oil (isooctane containing 100 mg/L S of DBT or DMDBT), white precipitate formed immediately, which was kept stirring for 0.5 h (Fig. S23-S24). The precipitate was isolated from the oil by centrifugation, which proved to be the 1:1 adduct, as verified by  $^1\text{H}$ NMR and PXRD. From the mass of the precipitate, it is estimated that 91.7 % of DBT or 89.9 % DMDBT have been removed from oil at this stage. The remaining  $\text{Ag}_3\text{pz}_3$  and DBT/DMDBT in the oil can be further treated by acetonitrile extraction. By this desulfurization scheme, the S-content can be reduced from 100 mg/L S to 0.55 mg/L S and 1.50 mg/L S for DBT and DMDBT, respectively, and ICP measurement shows no detectable  $\text{Ag}^+$  atoms left in the oil after treatment.

### Recyclable Performance

The recycling of  $\text{Ag}_3\text{pz}_3$  was investigated as a potential scrubber for removal of DBT and DMDBT from isooctane. Firstly, addition of 1.3 equivalent of  $\text{Ag}_3\text{pz}_3$  to a 10.0 mL of isooctane solution containing 100 mg/L S DBT or DMDBT resulted in the formation of a white precipitate, which was proved to be  $\text{Ag}_3\text{pz}_3\cdot\text{DBT}$  or  $\text{Ag}_3\text{pz}_3\cdot\text{DMDBT}$  based on  $^1\text{H}$ NMR and PXRD measurements. Then, the remaining  $\text{Ag}_3\text{pz}_3$  and DBT or DMDBT were extracted by  $3\times 3.3$  mL of acetonitrile. At last, the sample of  $\text{Ag}_3\text{pz}_3$  can be recovered from  $\text{Ag}_3\text{pz}_3\cdot\text{DBT}$  or  $\text{Ag}_3\text{pz}_3\cdot\text{DMDBT}$  by column chromatography using silica gel as stationary phase; DBT or DMDBT can be firstly eluted out by using petroleum ether as eluent, while  $\text{Ag}_3\text{pz}_3$  remains on the column, the latter of which can be obtained by eluting the column with ethyl acetate. As shown in Fig. S25 and Fig. S26,  $\text{Ag}_3\text{pz}_3$  can be reused at least five times without obvious loss of desulfurizing efficiency, proving that  $\text{Ag}_3\text{pz}_3$  is promising for practical applications. The  $^1\text{H}$ NMR of the recovered sample of  $\text{Ag}_3\text{pz}_3$  after five recycles is identical to that of as-synthesized sample.

### X-ray Crystallography

Crystallographic data were collected on a Bruker AXS GmbH diffractometer with graphite monochromated Mo-K $\alpha$  radiation ( $\lambda = 0.7107 \text{ \AA}$ ) at 298 K for  $\text{Ag}_3\text{pz}_3\cdot\text{BT}$  and  $\text{Ag}_3\text{pz}_3\cdot\text{DMT}$ , and at 100 K for  $\text{Ag}_3\text{pz}_3\cdot\text{DMDBT}$ ; Crystallographic data was collected on an Agilent Technologies SuperNova Single Crystal Diffractometer equipped with graphite-monochromatic Mo-K $\alpha$  radiation ( $\lambda = 0.71073 \text{ \AA}$ ) at 120 K for  $\text{Ag}_3\text{pz}_3\cdot\text{DBT}$ . Absorption corrections were obtained by using the multiscan program. All the structures were solved by direct methods with SHELXS and refined with the full-matrix least-squares technique using the SHELXL program<sup>1</sup> implemented through Olex2.<sup>2</sup> All non-hydrogen atoms were refined anisotropically, while the hydrogen atoms were generated geometrically. The crystallographic data are summarized in Table S12. CCDC: 1938383-1938386 for  $\text{Ag}_3\text{pz}_3\cdot\text{DBT}$ ,  $\text{Ag}_3\text{pz}_3\cdot\text{DMDBT}$ ,  $\text{Ag}_3\text{pz}_3\cdot\text{BT}$  and  $\text{Ag}_3\text{pz}_3\cdot\text{DMT}$ , contains the supplementary crystallographic data for this paper, which can be obtained free of charge from the Cambridge Crystallographic Data Center.

### Computational Details

The density functional theory (DFT) calculation, which has been widely applied in many kinds of computational studies,<sup>3</sup> was carried out with the Gaussian16 program.<sup>4</sup> The geometries were fully optimized using M06-L method<sup>5</sup> based on the X-ray diffraction data. In the calculation, basis set 6-31G(d, p) was used for H, C, N, F, and S atoms, while LANL2DZ was applied for Ag atom.<sup>6</sup>

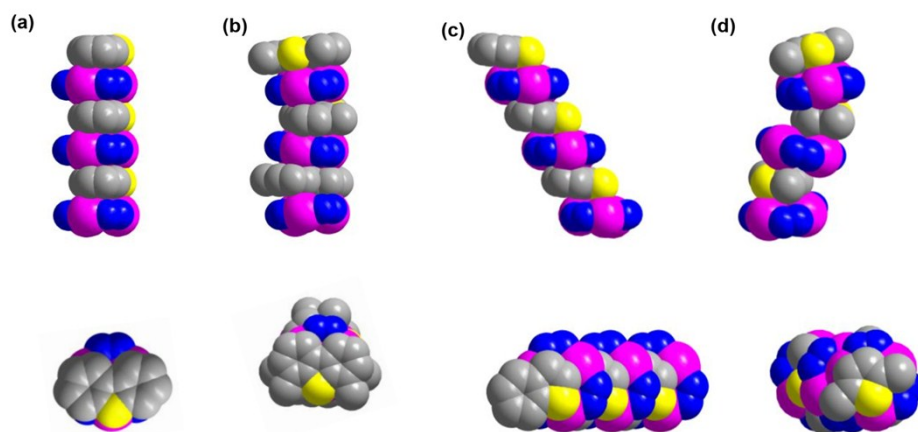

**Fig. S1** The side view and top view of columnar stack of (a)  $\text{Ag}_3\text{pz}_3\cdot\text{DBT}$ ; (b)  $\text{Ag}_3\text{pz}_3\cdot\text{DMDBT}$ ; (c)  $\text{Ag}_3\text{pz}_3\cdot\text{BT}$ ; (d)  $\text{Ag}_3\text{pz}_3\cdot\text{DMT}$ . Trifluoromethyl groups and hydrogen atoms have been omitted for clarity.

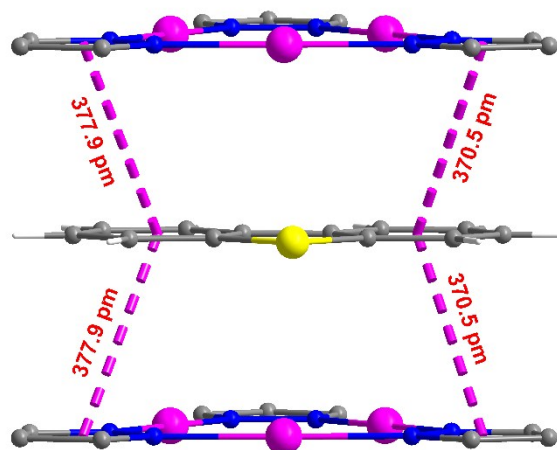

**Fig. S2** The side view of  $\text{Ag}_3\text{pz}_3\cdot\text{DBT}$  showing pyrazolyl-phenyl  $\pi$ - $\pi$  interactions. Colour code: Ag, pink; N, blue; C, gray; H, white; S, yellow. The trifluoromethyl groups and hydrogen atoms of pyrazole have been omitted for clarity.

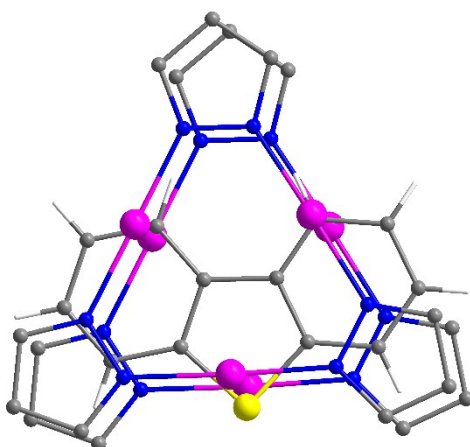

**Fig. S3** The top view of  $\text{Ag}_3\text{pz}_3\cdot\text{DBT}$ . Colour code: Ag, pink; N, blue; C, gray; H, white; S, yellow. The trifluoromethyl groups and hydrogen atoms of pyrazole have been omitted for clarity.

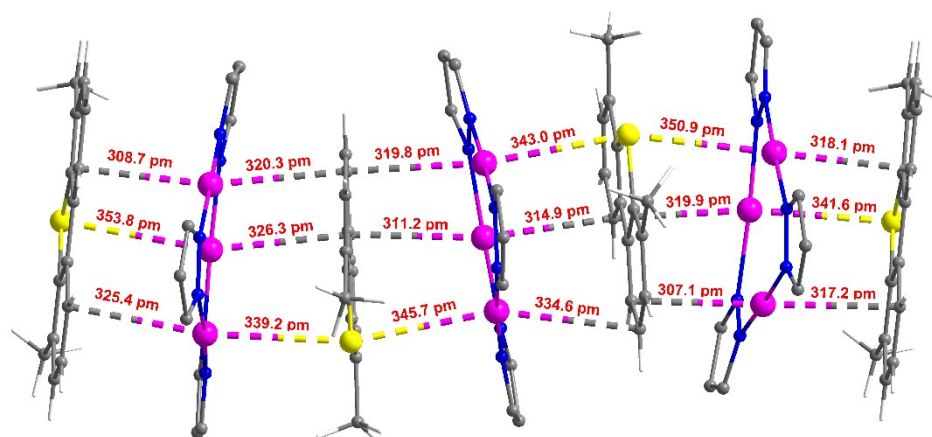

**Fig. S4** The Ag $\cdots$ S and Ag $\cdots$ C contacts observed in the adduct of **Ag<sub>3</sub>pz<sub>3</sub>·DMDBT**. Colour code: Ag, pink; N, blue; C, gray; H, white; S, yellow. The trifluoromethyl groups and hydrogen atoms of pyrazole have been omitted for clarity.

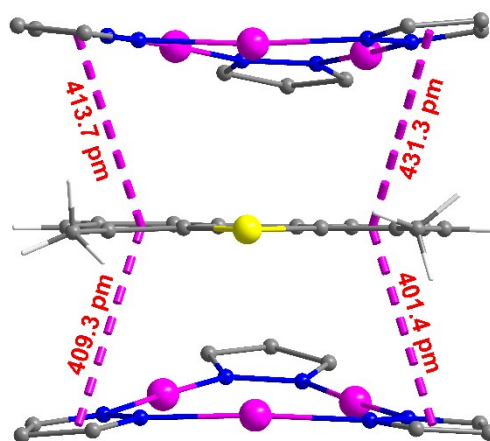

**Fig. S5** The side view of **Ag<sub>3</sub>pz<sub>3</sub>·DMDBT** showing pyrazolyl-phenyl  $\pi$ - $\pi$  interactions. Colour code: Ag, pink; N, blue; C, gray; H, white; S, yellow. The trifluoromethyl groups and hydrogen atoms of pyrazole have been omitted for clarity.

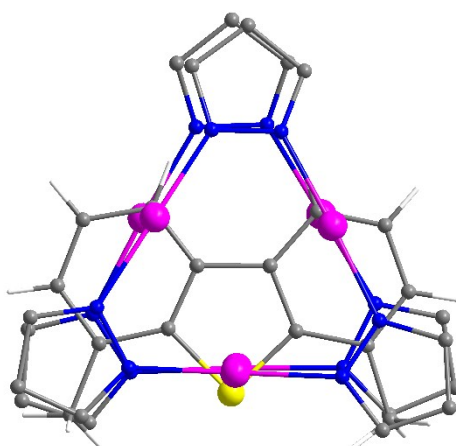

**Fig. S6** The top view of **Ag<sub>3</sub>pz<sub>3</sub>·DMDBT**. Colour code: Ag, pink; N, blue; C, gray; H, white; S, yellow. The trifluoromethyl groups and hydrogen atoms of pyrazole have been omitted for clarity.

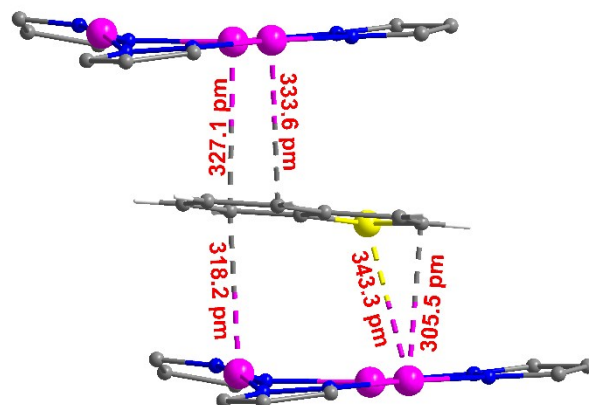

**Fig. S7** A fragment of the displaced columnar stacking of  $\text{Ag}_3\text{pz}_3\cdot\text{BT}$ , showing  $\text{Ag}\cdots\text{S}$  and  $\text{Ag}\cdots\text{C}$  contacts. Colour code: Ag, pink; N, blue; C, gray; H, white; S, yellow. The trifluoromethyl groups and hydrogen atoms of pyrazole have been omitted for clarity.

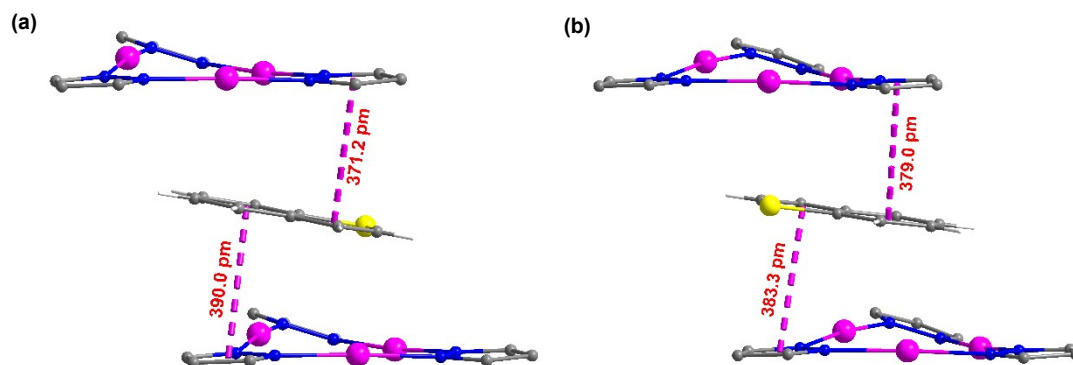

**Fig. S8** The side view of  $\text{Ag}_3\text{pz}_3\cdot\text{BT}$  showing pyrazolyl-phenyl and/or pyrazolyl-thiophene  $\pi$ - $\pi$  interactions. Colour code: Ag, pink; N, blue; C, gray; H, white; S, yellow. The trifluoromethyl groups and hydrogen atoms of pyrazole have been omitted for clarity.

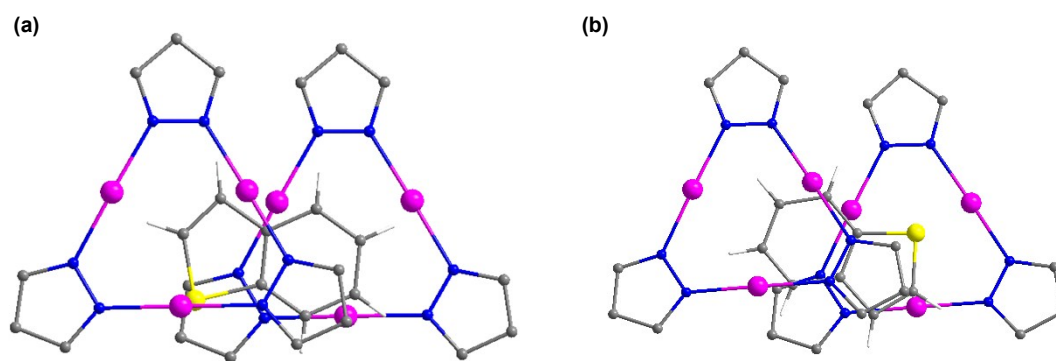

**Fig. S9** The top view of  $\text{Ag}_3\text{pz}_3\cdot\text{BT}$ . Colour code: Ag, pink; N, blue; C, gray; H, white; S, yellow. The trifluoromethyl groups and hydrogen atoms of pyrazole have been omitted for clarity.

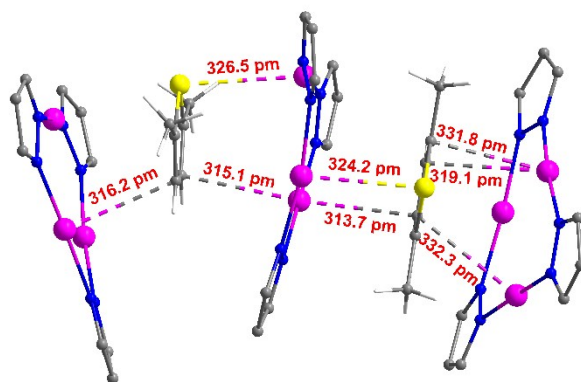

**Fig. S10** The Ag...S and Ag...C contacts observed in the adduct of  $\text{Ag}_3\text{pz}_3 \cdot \text{DMT}$ . Colour code: Ag, pink; N, blue; C, gray; H, white; S, yellow. The trifluoromethyl groups and hydrogen atoms of pyrazole have been omitted for clarity.

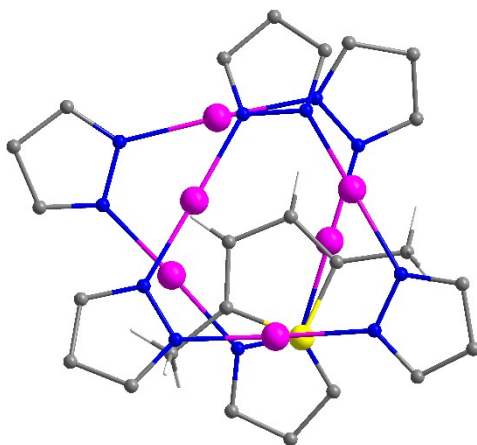

**Fig. S11** The top view of  $\text{Ag}_3\text{pz}_3 \cdot \text{DMT}$ . Colour code: Ag, pink; N, blue; C, gray; H, white; S, yellow. The trifluoromethyl groups and hydrogen atoms of pyrazole have been omitted for clarity.

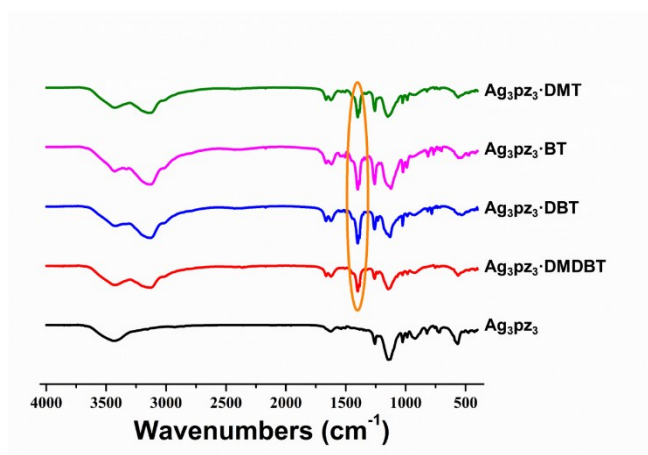

**Fig. S12** IR spectra (KBr pellet) of  $\text{Ag}_3\text{pz}_3$  and adducts. The peak of near  $1400 \text{ cm}^{-1}$  corresponds to the stretching vibration of the thiophenyl ring in the adducts.<sup>7-9</sup>

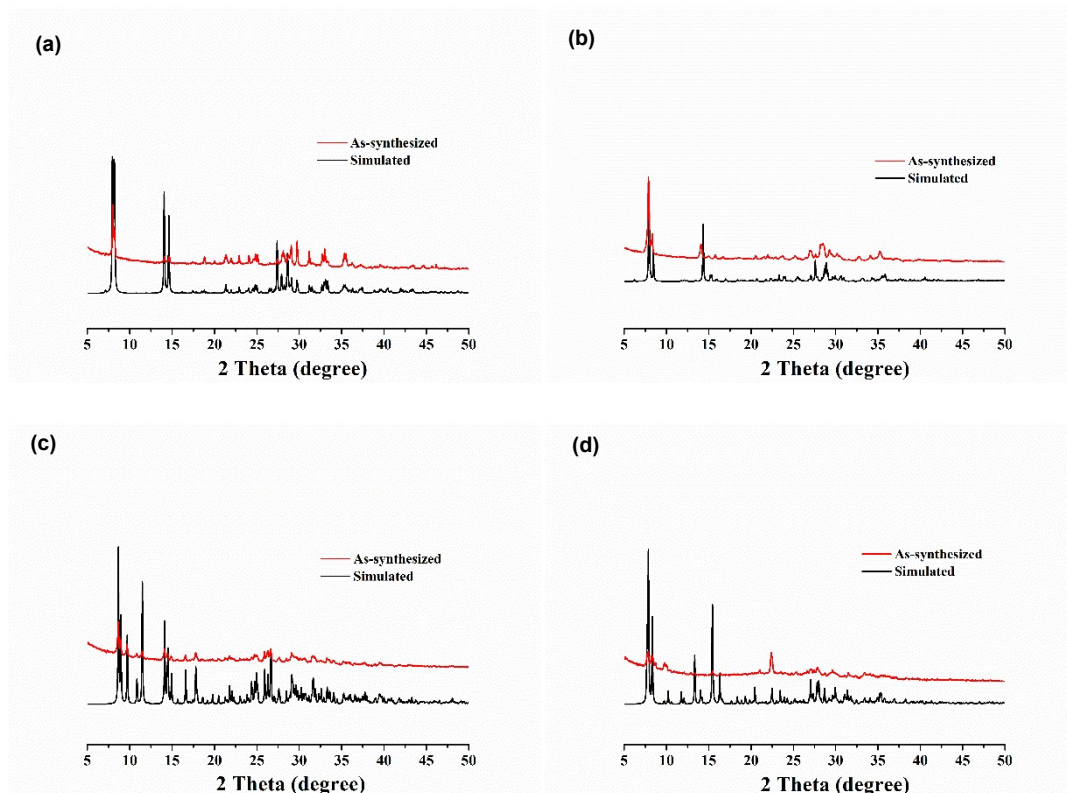

**Fig. S13** The P-XRD patterns of (a)  $\text{Ag}_3\text{pz}_3\cdot\text{DBT}$ ; (b)  $\text{Ag}_3\text{pz}_3\cdot\text{DMDBT}$ ; (c)  $\text{Ag}_3\text{pz}_3\cdot\text{BT}$ ; (d)  $\text{Ag}_3\text{pz}_3\cdot\text{DMT}$ , obtained from the as-synthesized sample (red line) or simulated based on the crystal data (black line).

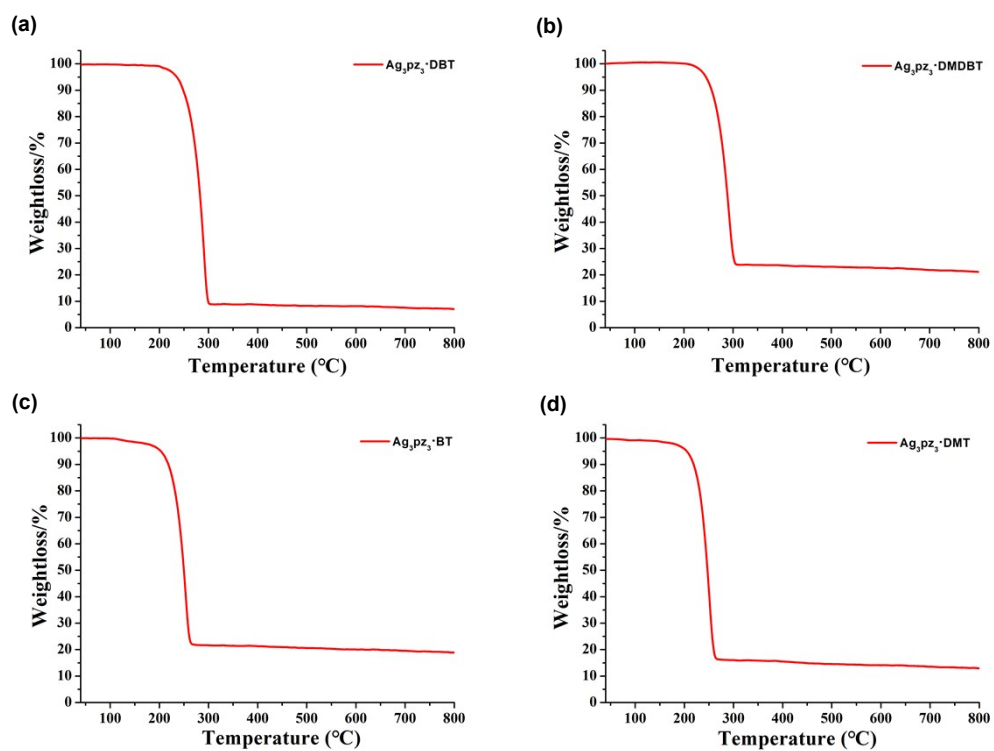

**Fig. S14** Thermogravimetric curves of (a)  $\text{Ag}_3\text{pz}_3\cdot\text{DBT}$ ; (b)  $\text{Ag}_3\text{pz}_3\cdot\text{DMDBT}$ ; (c)  $\text{Ag}_3\text{pz}_3\cdot\text{BT}$ ; (d)  $\text{Ag}_3\text{pz}_3\cdot\text{DMT}$ .

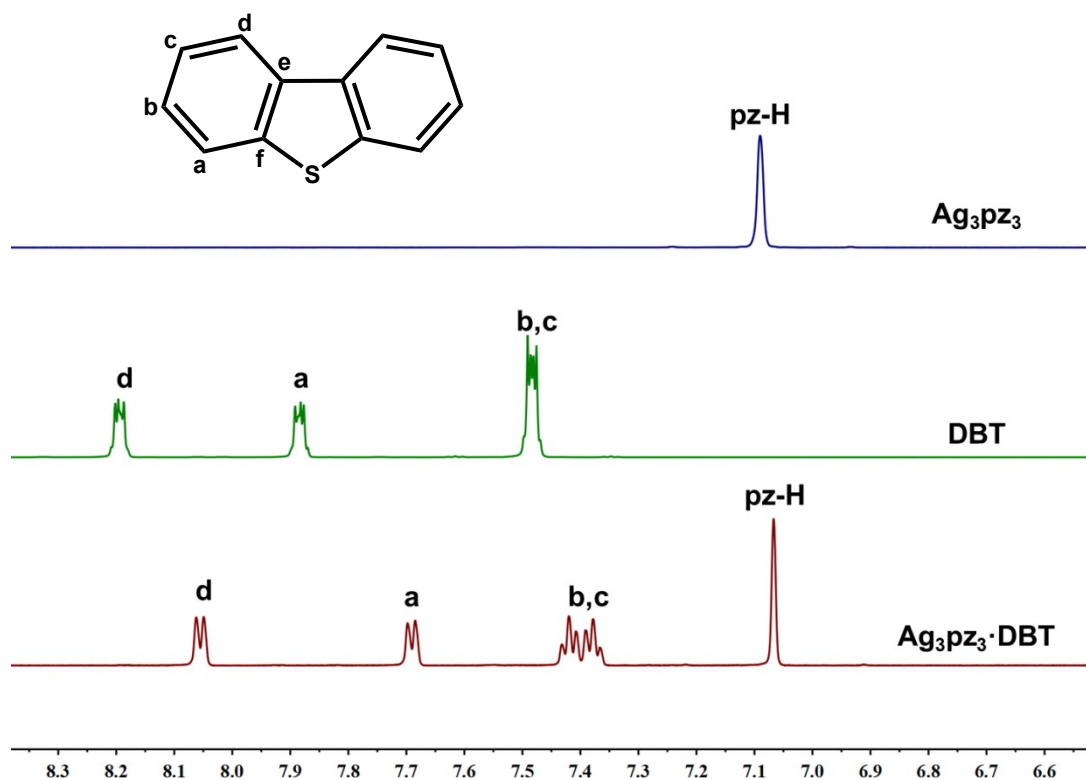

Fig. S15 Stack plot of  $^1\text{H}$  NMR spectra for  $\text{Ag}_3\text{pz}_3$ , **DBT** and  $\text{Ag}_3\text{pz}_3 \cdot \text{DBT}$  in  $\text{CD}_2\text{Cl}_2$ .

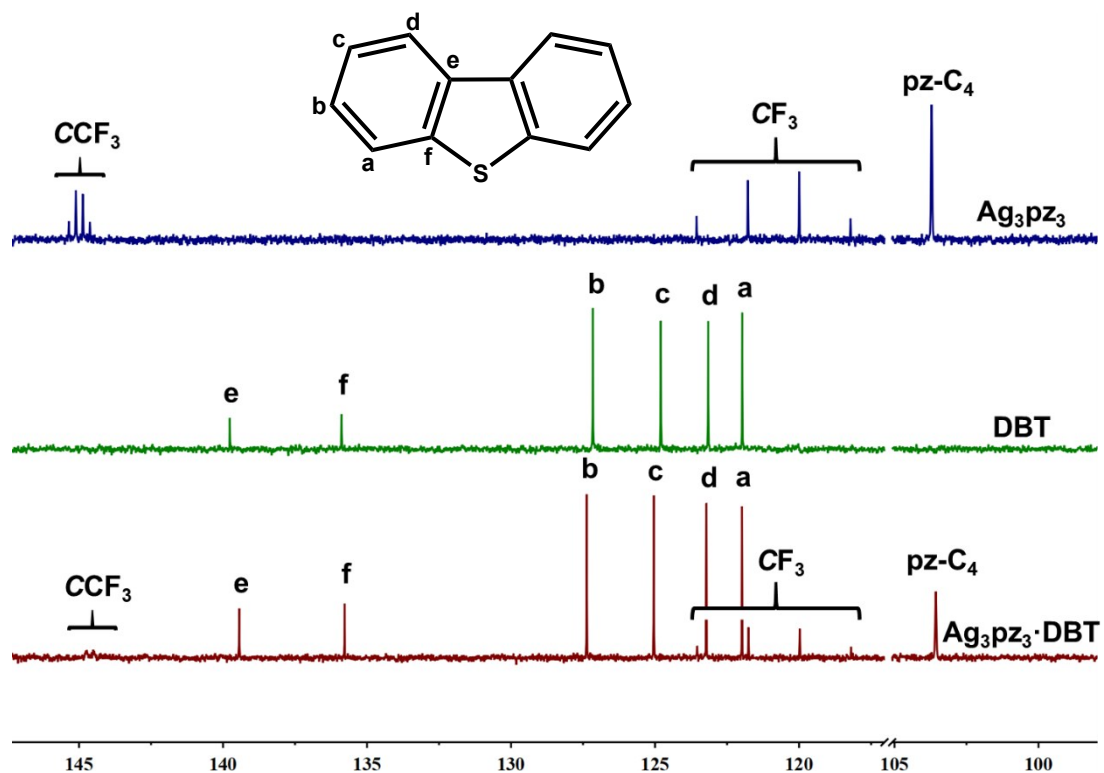

Fig. S16 Stack plot of  $^{13}\text{C}$  NMR spectra for  $\text{Ag}_3\text{pz}_3$ , **DBT** and  $\text{Ag}_3\text{pz}_3 \cdot \text{DBT}$  in  $\text{CD}_2\text{Cl}_2$ .

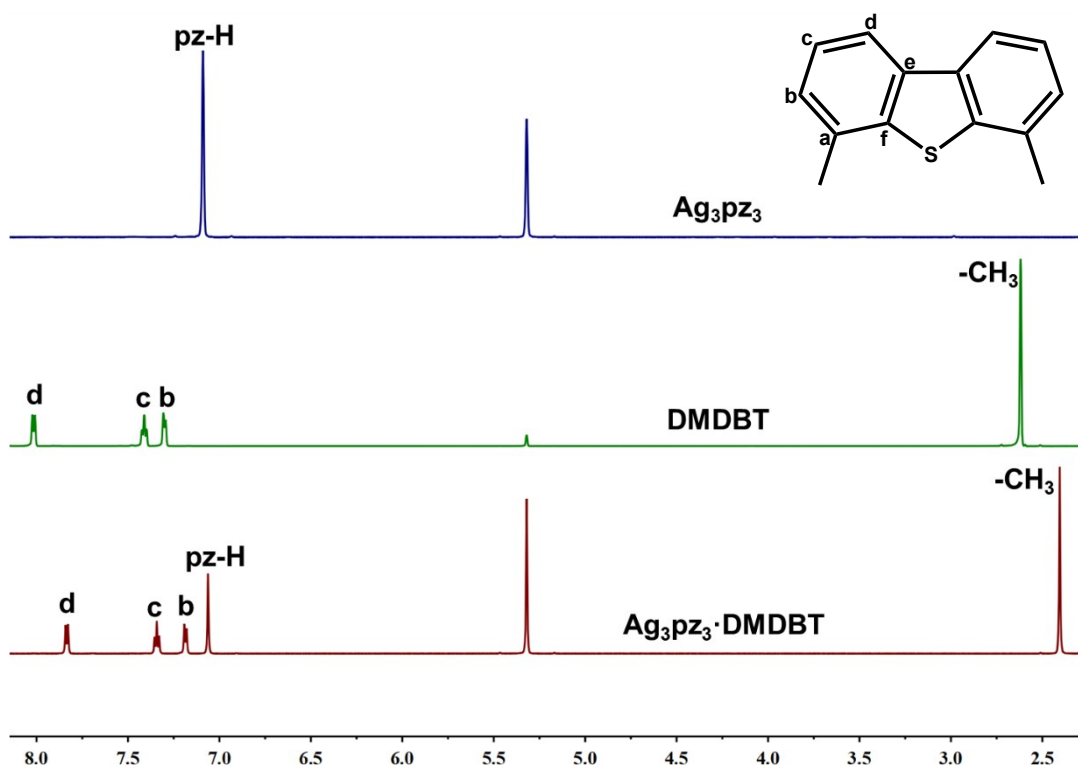

Fig. S17 Stack plot of  $^1\text{H}$  NMR spectra for  $\text{Ag}_3\text{pz}_3$ , DMDBT and  $\text{Ag}_3\text{pz}_3 \cdot \text{DMDBT}$  in CD $_2$ Cl $_2$ .

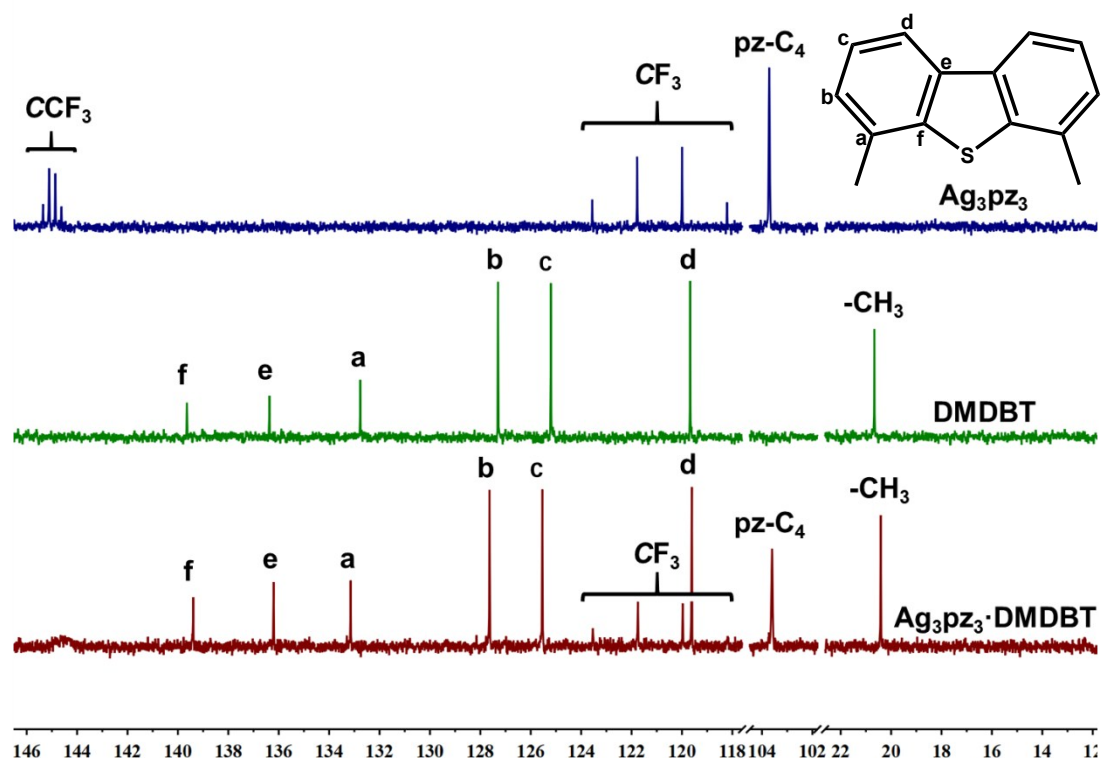

Fig. S18 Stack plot of  $^{13}\text{C}$  NMR spectra for  $\text{Ag}_3\text{pz}_3$ , DMDBT and  $\text{Ag}_3\text{pz}_3 \cdot \text{DMDBT}$  in CD $_2$ Cl $_2$ .

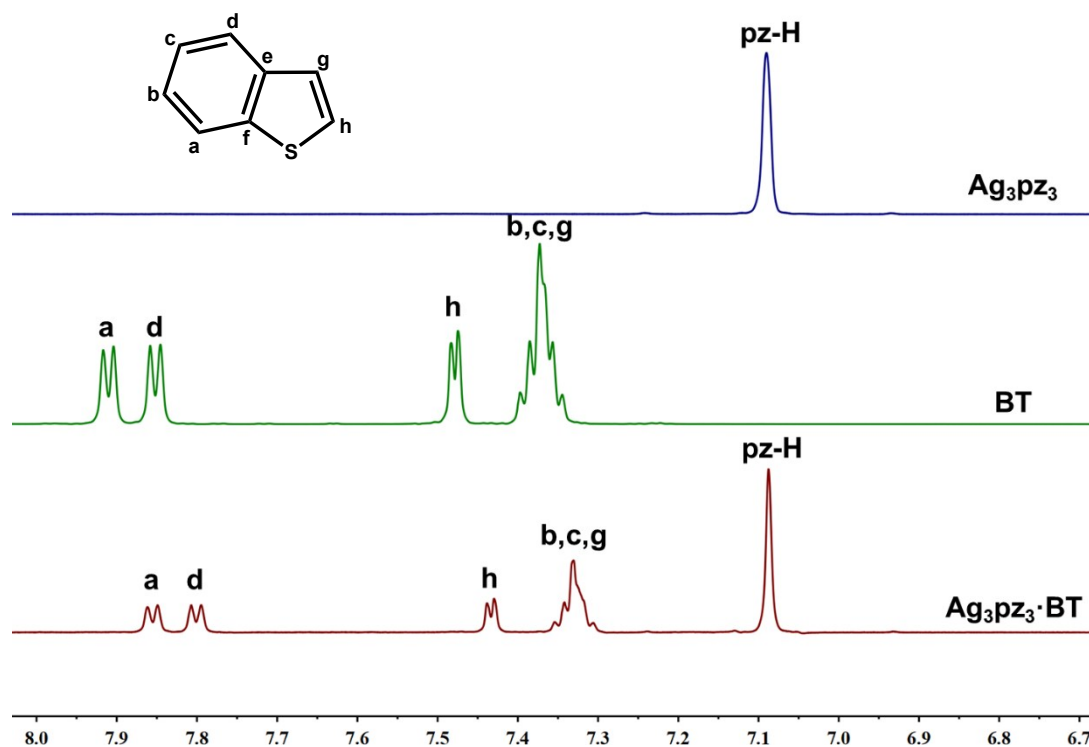

Fig. S19 Stack plot of  $^1\text{H}$  NMR spectra for  $\text{Ag}_3\text{pz}_3$ , BT and  $\text{Ag}_3\text{pz}_3 \cdot \text{BT}$  in  $\text{CD}_2\text{Cl}_2$ .

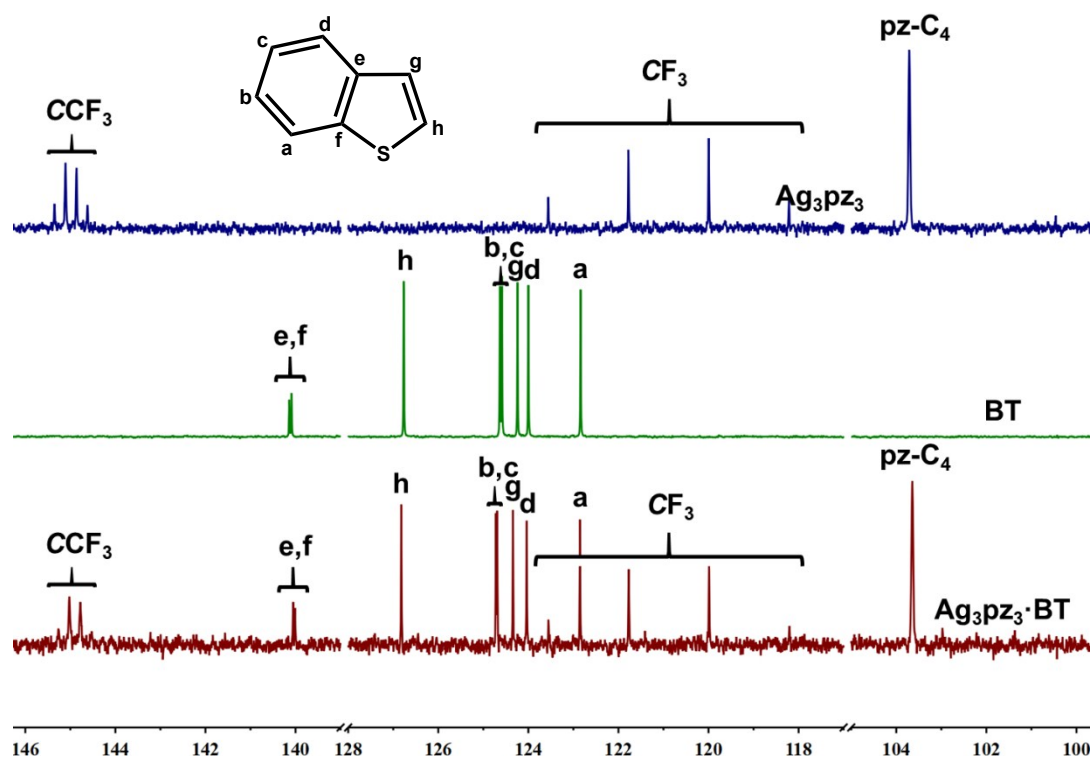

Fig. S20 Stack plot of  $^{13}\text{C}$  NMR spectra for  $\text{Ag}_3\text{pz}_3$ , BT and  $\text{Ag}_3\text{pz}_3 \cdot \text{BT}$  in  $\text{CD}_2\text{Cl}_2$ .

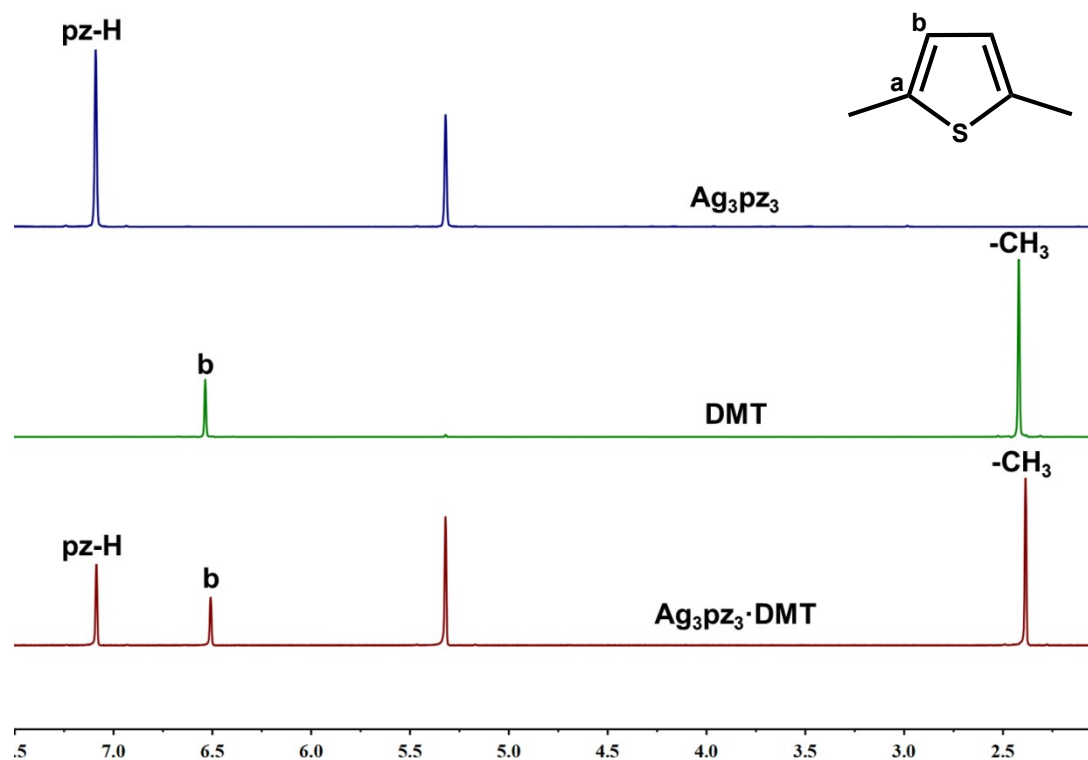

Fig. S21 Stack plot of  $^1\text{H}$  NMR spectra for  $\text{Ag}_3\text{pz}_3$ , DMT and  $\text{Ag}_3\text{pz}_3 \cdot \text{DMT}$  in  $\text{CD}_2\text{Cl}_2$ .

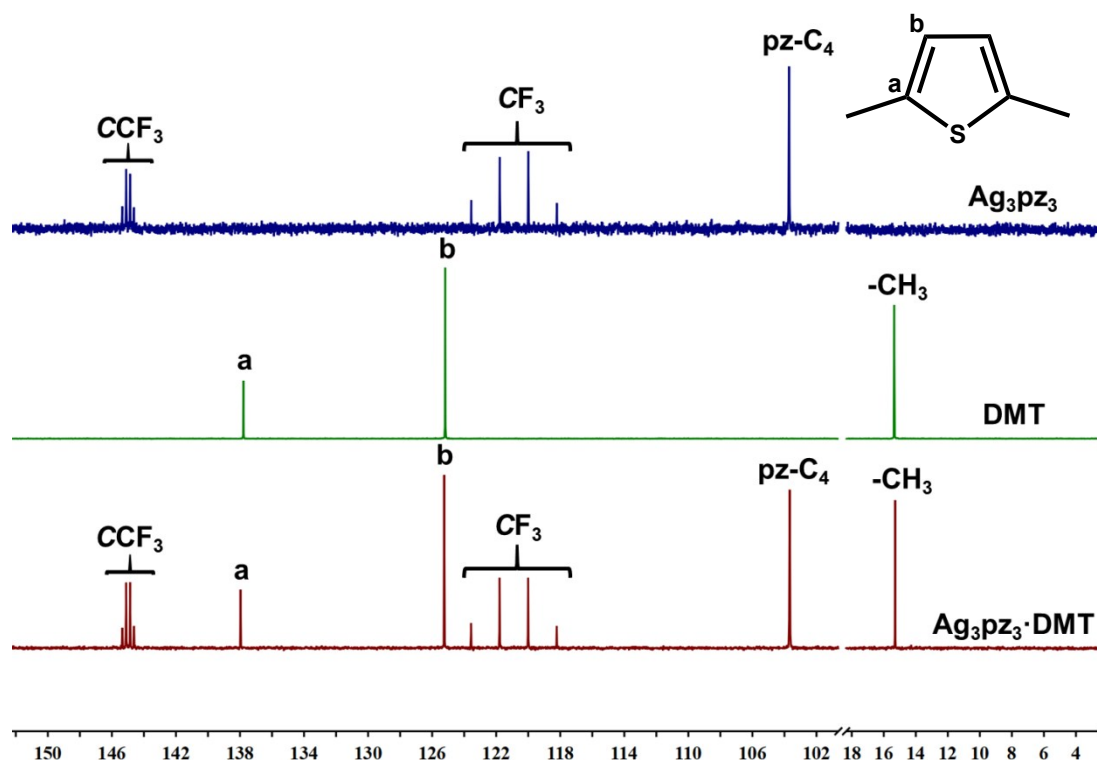

Fig. S22 Stack plot of  $^{13}\text{C}$  NMR spectra for  $\text{Ag}_3\text{pz}_3$ , DMT and  $\text{Ag}_3\text{pz}_3 \cdot \text{DMT}$  in  $\text{CD}_2\text{Cl}_2$ .

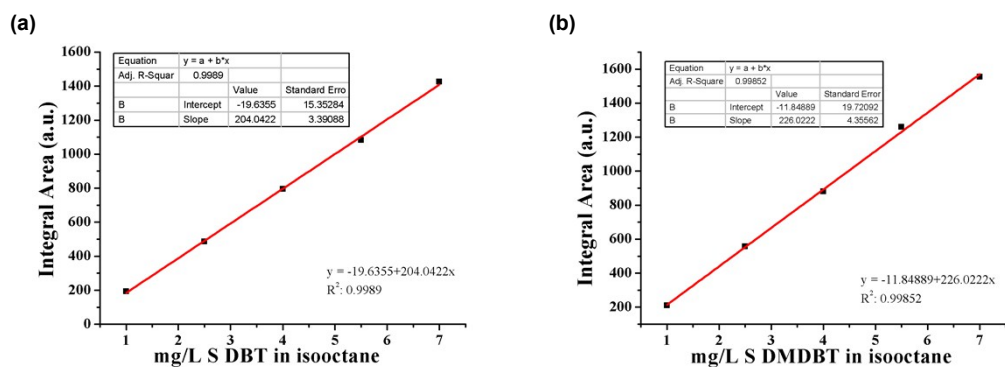

**Fig. S23** Standard curve of DBT (a) and DMBDT (b) in isooctane in the range of 1.0-7.0 mg/L S based on HPLC.

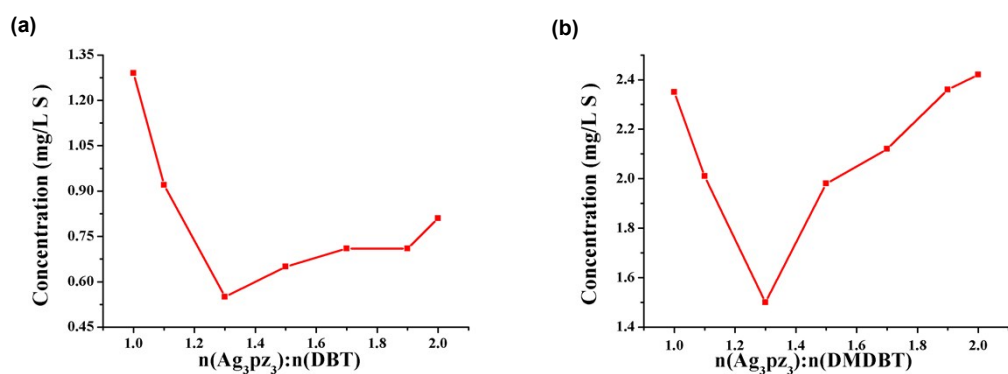

**Fig. S24** The remaining sulfur concentrations measured after the addition of  $\text{Ag}_3\text{pz}_3$  into the model oil containing DBT(a) or DMBDT(b), indicating desulfurization performance is optimal when the molar ratio of  $\text{Ag}_3\text{pz}_3$  : DBT (or DMBDT) = 1.3 : 1.

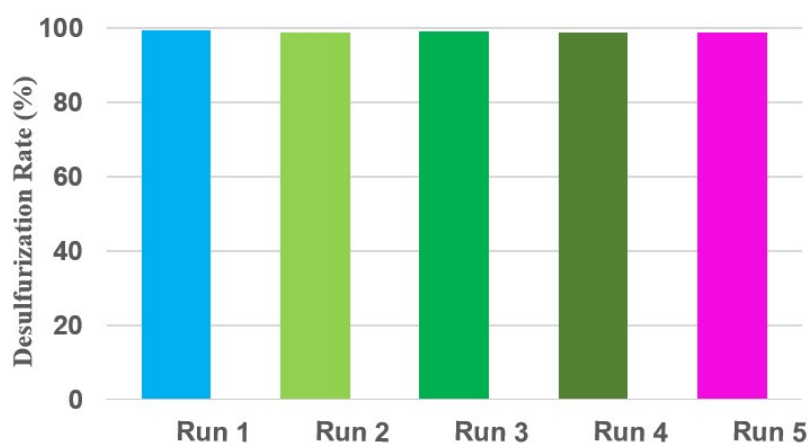

**Fig. S25** Recycling test of  $\text{Ag}_3\text{pz}_3$  for the removal of DBT from isooctane.

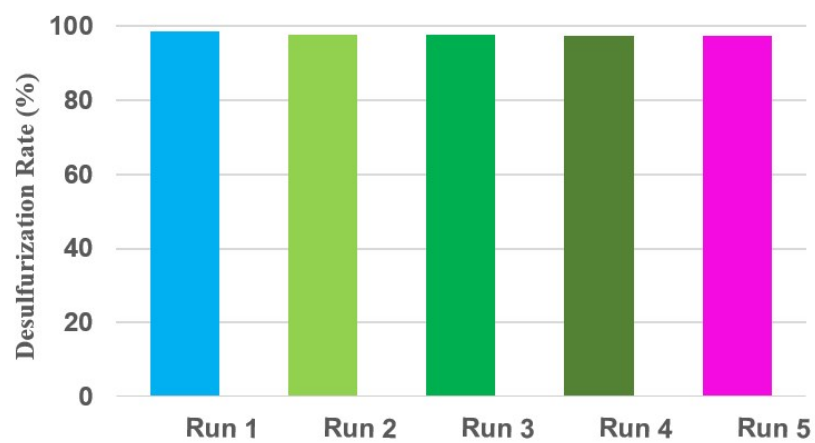

**Fig. S26** Recycling test of  $\text{Ag}_3\text{pz}_3$  for the removal of DMDBT from isooctane.

**Table S1.** A summary of Ag $\cdots$ S, Ag $\cdots$ C contacts and the  $\pi$ - $\pi$  interactions in the adducts.

|                                                              | Ag <sub>3</sub> pz <sub>3</sub> ·DBT                                      | Ag <sub>3</sub> pz <sub>3</sub> ·DMDBT                                                                                                                                  | Ag <sub>3</sub> pz <sub>3</sub> ·BT                                                                          | Ag <sub>3</sub> pz <sub>3</sub> ·DMT                                          |
|--------------------------------------------------------------|---------------------------------------------------------------------------|-------------------------------------------------------------------------------------------------------------------------------------------------------------------------|--------------------------------------------------------------------------------------------------------------|-------------------------------------------------------------------------------|
| Ag $\cdots$ S (Å)                                            | 3.2032(11); 3.2224(13); 3.2118(12)                                        | 3.3921(23); 3.4163(21); 3.4296(19);<br>3.4566(20); 3.5091(22); 3.5376(24);                                                                                              | 3.228(11);<br>3.433(11)                                                                                      | 3.2421(30); 3.2646(33)                                                        |
| Average (Å)                                                  | 3.2125                                                                    | 3.4569<br>The steric hindrance of the two methyl groups is too large, causing the distance to be longer than other Ag $\cdots$ S distances                              | 3.331                                                                                                        | 3.2534                                                                        |
| Ag $\cdots$ C (Å)                                            | 3.1668(25); 3.1669(25); 3.1690(26);<br>3.1774(21); 3.1909(28); 3.2064(37) | 3.0708(90); 3.0872(96); 3.1118(84); 3.1492(73);<br>3.1725(93); 3.1807(97); 3.1981(90); 3.1993(78);<br>3.2032(83); 3.254(10); 3.2629(77); 3.346(11)                      | 3.055(23);<br>3.182(16);<br>3.203(17);<br>3.271(16);<br>3.284(16);<br>3.305(13);<br>3.336(16);<br>3.351(17); | 3.1624(76); 3.1514(86);<br>3.1374(84); 3.3181(57);<br>3.1914(77); 3.3234(93); |
| Average (Å)                                                  | 3.1796                                                                    | 3.1863                                                                                                                                                                  | 3.248                                                                                                        | 3.2140                                                                        |
| Phenyl (thienyl)-<br>pyrazolyl $\pi$ - $\pi$<br>stacking (Å) | 3.6763(1); 3.8143(1); 3.7788(1);<br>3.7047(1); 3.9036(1); 3.6818(1)       | 3.8926(2); 3.9511(2); 3.9848(2); 4.0087(2); 4.0139(2);<br>4.0606(2); 4.0839(2); 4.0929(2); 4.1368(2); 4.2338(2);<br>4.3127(2); 4.3535(2);                               | 3.7122; 3.7902;<br>3.8328; 3.9004                                                                            |                                                                               |
| Average (Å)                                                  | 3.7599                                                                    | 4.0938<br>The steric hindrance of the two methyl groups is too large, causing the distance to be longer than other distances of phenyl-pyrazolyl $\pi$ - $\pi$ stacking | 3.8089                                                                                                       |                                                                               |

**Table S2.** Comparison of  $^1\text{H}$  NMR of  $\text{Ag}_3\text{pz}_3$ , DBT and  $\text{Ag}_3\text{pz}_3\cdot\text{DBT}$ .

| $^1\text{H}$ NMR /ppm                   | pz-H    | d       | a       | b,c      |
|-----------------------------------------|---------|---------|---------|----------|
| DBT                                     |         | 8.20(m) | 7.89(m) | 7.49(m)  |
| $\text{Ag}_3\text{pz}_3$                | 7.09(s) |         |         |          |
| $\text{Ag}_3\text{pz}_3\cdot\text{DBT}$ | 7.07(s) | 8.06(d) | 7.69(t) | 7.40(dt) |
| $\Delta/\text{ppm}$                     | 0.02    | 0.14    | 0.13    | 0.09     |

**Table S3.** Comparison of  $^{13}\text{C}$  NMR of  $\text{Ag}_3\text{pz}_3$ , DBT and  $\text{Ag}_3\text{pz}_3\cdot\text{DBT}$ .

| $^{13}\text{C}$ NMR /ppm                | $\text{CCF}_3$ | $\text{CF}_3$ | pz- $\text{C}_4$ | e      | f      | b      | c      | d      | a      |
|-----------------------------------------|----------------|---------------|------------------|--------|--------|--------|--------|--------|--------|
| DBT                                     |                |               |                  | 139.76 | 135.89 | 127.16 | 124.80 | 123.16 | 121.97 |
| $\text{Ag}_3\text{pz}_3$                | 144.99         | 120.89        | 103.71           |        |        |        |        |        |        |
| $\text{Ag}_3\text{pz}_3\cdot\text{DBT}$ |                | 120.86        | 103.57           | 139.44 | 135.78 | 127.37 | 125.04 | 123.22 | 121.98 |
| $\Delta/\text{ppm}$                     |                | 0.03          | 0.14             | 0.32   | 0.11   | -0.21  | -0.24  | -0.06  | -0.01  |

**Table S4.** Comparison of  $^1\text{H}$  NMR of  $\text{Ag}_3\text{pz}_3$ , DMDBT and  $\text{Ag}_3\text{pz}_3\cdot\text{DMDBT}$ .

| $^1\text{H}$ NMR /ppm                     | pz-H    | d       | c       | b       | $-\text{CH}_3$ |
|-------------------------------------------|---------|---------|---------|---------|----------------|
| DMDBT                                     |         | 8.02(d) | 7.41(t) | 7.30(d) | 2.62(s)        |
| $\text{Ag}_3\text{pz}_3$                  | 7.09(s) |         |         |         |                |
| $\text{Ag}_3\text{pz}_3\cdot\text{DMDBT}$ | 7.07(s) | 7.84(d) | 7.34(t) | 7.19(d) | 2.41(s)        |
| $\Delta/\text{ppm}$                       | 0.02    | 0.18    | 0.07    | 0.11    | 0.21           |

**Table S5.** Comparison of  $^{13}\text{C}$  NMR of  $\text{Ag}_3\text{pz}_3$ , DMDBT and  $\text{Ag}_3\text{pz}_3\cdot\text{DMDBT}$ .

| $^{13}\text{C}$ NMR /ppm                  | $\text{CCF}_3$ | $\text{CF}_3$ | pz- $\text{C}_4$ | f      | e      | a      | b      | c      | d      | $-\text{CH}_3$ |
|-------------------------------------------|----------------|---------------|------------------|--------|--------|--------|--------|--------|--------|----------------|
| DMDBT                                     |                |               |                  | 139.64 | 136.37 | 132.77 | 127.30 | 125.20 | 119.67 | 20.66          |
| $\text{Ag}_3\text{pz}_3$                  | 144.99         | 120.89        | 103.71           |        |        |        |        |        |        |                |
| $\text{Ag}_3\text{pz}_3\cdot\text{DMDBT}$ |                | 120.86        | 103.60           | 139.39 | 136.20 | 133.15 | 127.64 | 125.54 | 119.56 | 20.41          |
| $\Delta/\text{ppm}$                       |                | 0.03          | 0.11             | 0.25   | 0.17   | -0.38  | -0.34  | -0.34  | 0.11   | 0.25           |

**Table S6.** Comparison of  $^1\text{H}$  NMR of  $\text{Ag}_3\text{pz}_3$ , BT and  $\text{Ag}_3\text{pz}_3\cdot\text{BT}$ .

| $^1\text{H}$ NMR /ppm                  | pz-H    | a       | d       | h       | b,c,g   |
|----------------------------------------|---------|---------|---------|---------|---------|
| BT                                     |         | 7.91(d) | 7.86(d) | 7.48(d) | 7.37(m) |
| $\text{Ag}_3\text{pz}_3$               | 7.09(s) |         |         |         |         |
| $\text{Ag}_3\text{pz}_3\cdot\text{BT}$ | 7.09(s) | 7.86(d) | 7.80(d) | 7.43(d) | 7.33(m) |
| $\Delta/\text{ppm}$                    | 0       | 0.05    | 0.06    | 0.05    | 0.04    |

**Table S7.** Comparison of  $^{13}\text{C}$  NMR of  $\text{Ag}_3\text{pz}_3$ , BT and  $\text{Ag}_3\text{pz}_3\cdot\text{BT}$ .

| $^{13}\text{C}$ NMR /ppm               | $\text{CCF}_3$ | $\text{CF}_3$ | pz- $\text{C}_4$ | f      | e      | h      | b      | c      | g      | d      | a      |
|----------------------------------------|----------------|---------------|------------------|--------|--------|--------|--------|--------|--------|--------|--------|
| BT                                     |                |               |                  | 140.14 | 140.09 | 126.77 | 124.63 | 124.59 | 124.24 | 124.00 | 122.84 |
| $\text{Ag}_3\text{pz}_3$               | 144.99         | 120.89        | 103.71           |        |        |        |        |        |        |        |        |
| $\text{Ag}_3\text{pz}_3\cdot\text{BT}$ | 144.90         | 120.87        | 103.65           | 140.05 | 140.01 | 126.82 | 124.72 | 124.69 | 124.34 | 124.04 | 122.85 |
| $\Delta/\text{ppm}$                    | 0.09           | 0.02          | 0.06             | 0.09   | 0.08   | -0.05  | -0.09  | -0.10  | -0.10  | -0.04  | -0.01  |

**Table S8.** Comparison of  $^1\text{H}$  NMR of  $\text{Ag}_3\text{pz}_3$ , DMT and  $\text{Ag}_3\text{pz}_3\cdot\text{DMT}$ .

| $^1\text{H}$ NMR /ppm                   | pz-H    | b       | - $\text{CH}_3$ |
|-----------------------------------------|---------|---------|-----------------|
| DMT                                     |         | 6.54(s) | 2.42(s)         |
| $\text{Ag}_3\text{pz}_3$                | 7.09(s) |         |                 |
| $\text{Ag}_3\text{pz}_3\cdot\text{DMT}$ | 7.09(s) | 6.51(s) | 2.39(s)         |
| $\Delta/\text{ppm}$                     | 0       | 0.03    | 0.03            |

**Table S9.** Comparison of  $^{13}\text{C}$  NMR of  $\text{Ag}_3\text{pz}_3$ , DMT and  $\text{Ag}_3\text{pz}_3\cdot\text{DMT}$ .

| $^{13}\text{C}$ NMR /ppm                | $\text{CCF}_3$ | $\text{CF}_3$ | pz- $\text{C}_4$ | a      | b      | - $\text{CH}_3$ |
|-----------------------------------------|----------------|---------------|------------------|--------|--------|-----------------|
| DMT                                     |                |               |                  | 137.79 | 125.18 | 15.35           |
| $\text{Ag}_3\text{pz}_3$                | 144.99         | 120.89        | 103.71           |        |        |                 |
| $\text{Ag}_3\text{pz}_3\cdot\text{DMT}$ | 144.99         | 120.90        | 103.67           | 137.96 | 125.24 | 15.29           |
| $\Delta/\text{ppm}$                     | 0              | -0.01         | 0.04             | -0.17  | -0.06  | 0.06            |

**Table S10.** The Gibbs free energy of  $\text{Ag}_3\text{pz}_3$ , HASC molecules and their adducts obtained by DFT-calculation.

|                                           | Gibbs free energy (a.u.) | Binding energy ( $\Delta G$ ) (Kcal/mol) |
|-------------------------------------------|--------------------------|------------------------------------------|
| $\text{Ag}_3\text{pz}_3$                  | -3136.282714             |                                          |
| DBT                                       | -860.118069              |                                          |
| $\text{Ag}_3\text{pz}_3\cdot\text{DBT}$   | -3996.422098             | -13.38                                   |
| DMDBT                                     | -938.700159              |                                          |
| $\text{Ag}_3\text{pz}_3\cdot\text{DMDBT}$ | -4075.003656             | -13.05                                   |
| BT                                        | -706.522071              |                                          |
| $\text{Ag}_3\text{pz}_3\cdot\text{BT}$    | -3842.81873              | -8.76                                    |
| DMT                                       | -631.507767              |                                          |
| $\text{Ag}_3\text{pz}_3\cdot\text{DMT}$   | -3767.801914             | -7.18                                    |

**Table S11.** Selected bond distances (Å) and bond angles (°).

|                                           |            |                   |            |
|-------------------------------------------|------------|-------------------|------------|
| <b>Ag<sub>3</sub>pz<sub>3</sub>·DBT</b>   |            |                   |            |
| Ag(1)-N(1)                                | 2.074(11)  | Ag(1)-N(6)        | 2.071(11)  |
| Ag(2)-N(2)                                | 2.070(11)  | Ag(2)-N(3)        | 2.099(12)  |
| Ag(3)-N(4)                                | 2.090(12)  | Ag(3)-N(5)        | 2.096(12)  |
| Ag(1)···Ag(2)                             | 3.4994(13) | Ag(2)···Ag(3)     | 3.4821(14) |
| Ag(3)···Ag(2)                             | 3.4685(14) | S(1A)···Ag(1)     | 3.2224(13) |
| S(2)···Ag(2)                              | 3.2118(12) | S(3)···Ag(3)      | 3.2032(11) |
| C(23C)···Ag(2)                            | 3.1690(26) | C(20C)···Ag(1)    | 3.2064(37) |
| C(23B)···Ag(1)                            | 3.1668(25) | C(20B)···Ag(3)    | 3.1774(21) |
| C(23A)···Ag(3)                            | 3.1909(28) | C(20A)···Ag(2)    | 3.1669(25) |
| N(1)-Ag(1)-N(6)                           | 178.5(4)   | N(2)-Ag(2)-N(3)   | 177.5(4)   |
| N(4)-Ag(3)-N(5)                           | 179.8(5)   |                   |            |
| <b>Ag<sub>3</sub>pz<sub>3</sub>·DMDBT</b> |            |                   |            |
| Ag(1)-N(1)                                | 2.119(6)   | Ag(1)-N(6)        | 2.075(6)   |
| Ag(2)-N(2)                                | 2.081(7)   | Ag(2)-N(3)        | 2.112 (6)  |
| Ag(3)-N(4)                                | 2.108(7)   | Ag(3)-N(5)        | 2.079(8)   |
| Ag(4)-N(7)                                | 2.137(7)   | Ag(4)-N(12)       | 2.085(7)   |
| Ag(5)-N(8)                                | 2.102(7)   | Ag(5)-N(9)        | 2.098(6)   |
| Ag(6)-N(10)                               | 2.059(8)   | Ag(6)-N(11)       | 2.079(7)   |
| Ag(7)-N(13)                               | 2.125(6)   | Ag(7)-N(18)       | 2.085(6)   |
| Ag(8)-N(14)                               | 2.100(7)   | Ag(8)-N(15)       | 2.109(7)   |
| Ag(9)-N(16)                               | 2.103(7)   | Ag(9)-N(17)       | 2.128(6)   |
| Ag(1)···Ag(2)                             | 3.4960(9)  | Ag(2)···Ag(3)     | 3.5442(10) |
| Ag(3)···Ag(1)                             | 3.4011(8)  | Ag(4)···Ag(5)     | 3.4861(9)  |
| Ag(5)···Ag(6)                             | 3.4481(10) | Ag(6)···Ag(4)     | 3.5151(9)  |
| Ag(7)···Ag(8)                             | 3.4434(10) | Ag(8)···Ag(9)     | 3.4766(10) |
| Ag(9)···Ag(7)                             | 3.5011(9)  | S(1)···Ag(1)      | 3.4163(21) |
| S(1)···Ag(7) <sup>#</sup>                 | 3.5376(24) | S(2)···Ag(3)      | 3.5091(22) |
| S(2)···Ag(6)                              | 3.4296(19) | S(3)···Ag(5)      | 3.4566(20) |
| S(3)···Ag(8)                              | 3.3921(23) | C(69)···Ag(1)     | 3.1993(78) |
| C(55)···Ag(2)                             | 3.1725(93) | C(67)···Ag(2)     | 3.0708(90) |
| C(53)···Ag(3)                             | 3.1807(97) | C(69)···Ag(4)     | 3.1492(73) |
| C(83)···Ag(4)                             | 3.1118(84) | C(66)···Ag(5)     | 3.346(11)  |
| C(81)···Ag(6)                             | 3.1981(90) | C(83)···Ag(7)     | 3.2629(77) |
| C(55) <sup>#</sup> ···Ag(8)               | 3.254(10)  | C(81)···Ag(9)     | 3.2032(83) |
| C(53) <sup>#</sup> ···Ag(9)               | 3.0872(96) | N(1)-Ag(1)-N(6)   | 176.9(2)   |
| N(2)-Ag(2)-N(3)                           | 176.4(3)   | N(4)-Ag(3)-N(5)   | 178.1(2)   |
| N(7)-Ag(4)-N(12)                          | 177.2(34)  | N(8)-Ag(5)-N(9)   | 176.0(3)   |
| N(10)-Ag(6)-N(11)                         | 176.2(2)   | N(13)-Ag(7)-N(18) | 178.1(2)   |
| N(14)-Ag(8)-N(15)                         | 175.6(3)   | N(16)-Ag(9)-N(17) | 177.6(2)   |
| <sup>#</sup> : 1+x, -1+y, -1+z            |            |                   |            |
| <b>Ag<sub>3</sub>pz<sub>3</sub>·BT</b>    |            |                   |            |
| Ag(1)-N(1)                                | 2.101(7)   | Ag(1)-N(6)        | 2.099(6)   |

|                 |            |                             |            |
|-----------------|------------|-----------------------------|------------|
| Ag(2)-N(2)      | 2.100(7)   | Ag(2)-N(3)                  | 2.100(7)   |
| Ag(3)-N(4)      | 2.096 (6)  | Ag(3)-N(5)                  | 2.089(6)   |
| Ag(1)...Ag(2)   | 3.4266(10) | Ag(2)...Ag(3)               | 3.4693(10) |
| Ag(3)...Ag(1)   | 3.4234(11) | S(1A)...Ag(1) <sup>#</sup>  | 3.228(11)  |
| S(1B)...Ag(1)   | 3.433(11)  | C(22A)...Ag(2) <sup>#</sup> | 3.351(18)  |
| C(18A)...Ag(1)  | 3.203(17)  | C(21A)...Ag(3)              | 3.305(13)  |
| C(20A)...Ag(3)  | 3.282(16)  | C(23B)...Ag(1)              | 3.055(23)  |
| C(17B)...Ag(3)  | 3.182(16)  | C(20B)...Ag(1)              | 3.336(16)  |
| C(17B)...Ag(2)  | 3.271(16)  | N(1)-Ag(1)-N(6)             | 178.0(3)   |
| N(2)-Ag(2)-N(3) | 174.9(3)   | N(4)-Ag(3)-N(5)             | 174.2(3)   |

<sup>#</sup>: -1+x, y, z

---

**Ag<sub>3</sub>pz<sub>3</sub>·DMT**

|                 |            |                            |            |
|-----------------|------------|----------------------------|------------|
| Ag(1)-N(1)      | 2.085(6)   | Ag(1)-N(6)                 | 2.099(8)   |
| Ag(2)-N(2)      | 2.084(6)   | Ag(2)-N(3)                 | 2.084(6)   |
| Ag(3)-N(4)      | 2.084(6)   | Ag(3)-N(5)                 | 2.101(8)   |
| Ag(4)-N(7)      | 2.095(6)   | Ag(4)-N(12)                | 2.093(6)   |
| Ag(5)-N(8)      | 2.088(5)   | Ag(5)-N(9)                 | 2.081(6)   |
| Ag(6)-N(10)     | 2.099(6)   | Ag(6)-N(11)                | 2.098(5)   |
| Ag(1)...Ag(2)   | 3.3697(7)  | Ag(2)...Ag(3)              | 3.4020(8)  |
| Ag(3)...Ag(1)   | 3.4567(11) | Ag(4)...Ag(5)              | 3.3651(7)  |
| Ag(5)...Ag(6)   | 3.4838(9)  | Ag(6)...Ag(4)              | 3.4352(6)  |
| S(1)...Ag(3)    | 3.2646(33) | S(2)...Ag(1) <sup>#</sup>  | 3.2421(30) |
| C(34)...Ag(2)   | 3.1514(86) | C(39)...Ag(2) <sup>#</sup> | 3.1374(84) |
| C(33)...Ag(4)   | 3.1624(76) | C(39)...Ag(4)              | 3.3234(93) |
| C(40)...Ag(5)   | 3.1914(77) | C(41)...Ag(5)              | 3.3181(57) |
| N(1)-Ag(1)-N(6) | 171.4(3)   | N(2)-Ag(2)-N(3)            | 178.6(2)   |
| N(4)-Ag(3)-N(5) | 169.8(3)   | N(7)-Ag(4)-N(12)           | 177.7(2)   |
| N(8)-Ag(5)-N(9) | 174.6(2)   | N(10)-Ag(6)-N(11)          | 174.8(2)   |

<sup>#</sup>: x, 1.5-y, -0.5+z

---

**Table S12.** Crystallographic data and structure refinements.

|                                               | <b>Ag<sub>3</sub>pz<sub>3</sub>·DBT</b>                                          | <b>Ag<sub>3</sub>pz<sub>3</sub>·DMDBT</b>                                        | <b>Ag<sub>3</sub>pz<sub>3</sub>·BT</b>                                          | <b>Ag<sub>3</sub>pz<sub>3</sub>·DMT</b>                                          |
|-----------------------------------------------|----------------------------------------------------------------------------------|----------------------------------------------------------------------------------|---------------------------------------------------------------------------------|----------------------------------------------------------------------------------|
| Formula                                       | C <sub>27</sub> H <sub>11</sub> Ag <sub>3</sub> F <sub>18</sub> N <sub>6</sub> S | C <sub>29</sub> H <sub>15</sub> Ag <sub>3</sub> F <sub>18</sub> N <sub>6</sub> S | C <sub>23</sub> H <sub>9</sub> Ag <sub>3</sub> F <sub>18</sub> N <sub>6</sub> S | C <sub>21</sub> H <sub>11</sub> Ag <sub>3</sub> F <sub>18</sub> N <sub>6</sub> S |
| Mol. wt.                                      | 1117.09                                                                          | 1145.14                                                                          | 1067.03                                                                         | 1045.03                                                                          |
| Crystal system                                | Monoclinic                                                                       | Triclinic                                                                        | Monoclinic                                                                      | Monoclinic                                                                       |
| Space group                                   | <i>C</i> 2/m                                                                     | <i>P</i> 1                                                                       | <i>P</i> 2 <sub>1</sub> /c                                                      | <i>P</i> 2 <sub>1</sub> /c                                                       |
| <i>a</i> (Å)                                  | 24.4726(12)                                                                      | 13.1618(8)                                                                       | 7.7008(10)                                                                      | 21.9258(5)                                                                       |
| <i>b</i> (Å)                                  | 6.3315(3)                                                                        | 15.6344(9)                                                                       | 10.1698(2)                                                                      | 13.2224(3)                                                                       |
| <i>c</i> (Å)                                  | 22.0593(10)                                                                      | 15.6527(9)                                                                       | 40.8111(7)                                                                      | 23.7561(6)                                                                       |
| $\alpha$ (deg)                                |                                                                                  | 83.7474(7)                                                                       |                                                                                 |                                                                                  |
| $\beta$ (deg)                                 | 90.630(5)                                                                        | 65.3474(7)                                                                       | 92.2883(6)                                                                      | 105.2918(9)                                                                      |
| $\gamma$ (deg)                                |                                                                                  | 65.8734(6)                                                                       |                                                                                 |                                                                                  |
| <i>V</i> (Å <sup>3</sup> )                    | 3417.8(3)                                                                        | 2664.3(3)                                                                        | 3193.60(9)                                                                      | 6643.3(3)                                                                        |
| <i>Z</i>                                      | 4                                                                                | 3                                                                                | 4                                                                               | 8                                                                                |
| <i>T</i> (K)                                  | 120                                                                              | 100                                                                              | 298                                                                             | 298                                                                              |
| $\rho_{\text{calcd.}}$ (Mg/m <sup>3</sup> )   | 2.171                                                                            | 2.141                                                                            | 2.219                                                                           | 2.090                                                                            |
| $\mu$ (mm <sup>-1</sup> )                     | 1.893                                                                            | 1.824                                                                            | 2.020                                                                           | 1.939                                                                            |
| Reflns collected                              | 6284                                                                             | 21246                                                                            | 47098                                                                           | 112579                                                                           |
| Reflns unique                                 | 3312                                                                             | 17932                                                                            | 7447                                                                            | 15297                                                                            |
|                                               | ( <i>R</i> <sub>int</sub> = 0.0309)                                              | ( <i>R</i> <sub>int</sub> = 0.0185)                                              | ( <i>R</i> <sub>int</sub> = 0.0502)                                             | ( <i>R</i> <sub>int</sub> = 0.0794)                                              |
| Final <i>R</i> indices                        | <i>R</i> <sub>1</sub> = 0.0743                                                   | <i>R</i> <sub>1</sub> = 0.0443                                                   | <i>R</i> <sub>1</sub> = 0.0643                                                  | <i>R</i> <sub>1</sub> = 0.0551                                                   |
| [ <i>I</i> > 2σ( <i>I</i> )]                  | <i>wR</i> <sub>2</sub> = 0.1655                                                  | <i>wR</i> <sub>2</sub> = 0.1070                                                  | <i>wR</i> <sub>2</sub> = 0.1842                                                 | <i>wR</i> <sub>2</sub> = 0.1346                                                  |
| <i>S</i>                                      | 1.071                                                                            | 1.056                                                                            | 1.024                                                                           | 1.006                                                                            |
| $\Delta\rho_{\text{max}}$ (eÅ <sup>-3</sup> ) | 2.57                                                                             | 1.34                                                                             | 1.61                                                                            | 0.67                                                                             |
| $\Delta\rho_{\text{min}}$ (eÅ <sup>-3</sup> ) | -2.25                                                                            | -1.16                                                                            | -1.35                                                                           | -0.55                                                                            |

## References

1. G. M. Sheldrick, *Acta Cryst.*, 2008, **A64**, 112.
2. O. V. Dolomanov, L. J. Bourhis, R. J. Gildea, J. A. K. Howard and H. Puschmann, *J. Appl. Cryst.*, 2009, **42**, 339.
3. a) D. Wei, B. Lei, M. Tang and C.-G. Zhan, *J. Am. Chem. Soc.*, 2012, **134**, 10436; b) X.-K. Guo, L.-B. Zhang, D. Wei and J.-L. Niu, *Chem. Sci.*, 2015, **6**, 7059.
4. M. J. Frisch, G. W. Trucks, H. B. Schlegel, G. E. Scuseria, M. A. Robb, J. R. Cheesman, J. A. Montgomery, T. Vreven, K. N. Kudin, J. C. Burant, J. M. Millam, S. S. Iyengar, J. Tomasi and V. Barone, et al., Gaussian16, Gaussian Inc., Wallingford, CT, 2017.
5. Y. Zhao and D. G. Truhlar, *J. Chem. Phys.*, 2006, **125**, 194101.
6. P. J. Hay and W. R. Wadt, *J. Chem. Phys.*, 1985, **82**, 299.
7. S. Hotta, S. D. D. V. Rughooputh, A. J. Heeger and F. Wudl, *Macromolecules*, 1987, **20**, 212.
8. Z. W. Sun and A. J. Frank, *J. Chem. Phys.*, 1991, **94**, 4600.
9. M. Lanzi, P. C. Bizzarri, L. Paganin and G. Cesari, *Synth. Met.*, 2007, **157**, 719.
